# Supplementary material
Source: PubMed Central journal article supplement (PMC10905630)
Supplement: sj-pdf-1-jcb-10.1177_0271678X231194863.pdf [file sj-pdf-1-jcb-10.1177_0271678X231194863.pdf]

**Supplemental Table 1.** Basic information of the participants involved.

| Group                     | No. | Sex    | Age,<br>year | Pulse<br>rate | Hypertension | Diabetes |
|---------------------------|-----|--------|--------------|---------------|--------------|----------|
| Young<br>healthy<br>group | #1  | Female | 24           | 60            | No           | No       |
|                           | #2  | Male   | 24           | 60            | No           | No       |
|                           | #3  | Female | 25           | 68            | No           | No       |
|                           | #4  | Male   | 29           | 81            | No           | No       |
|                           | #5  | Female | 28           | 72            | No           | No       |
|                           | #6  | Male   | 26           | 78            | No           | No       |
|                           | #7  | Male   | 26           | 69            | No           | No       |
| Older<br>health<br>group  | #8  | Male   | 49           | 60            | No           | No       |
|                           | #9  | Female | 61           | 61            | No           | No       |
|                           | #10 | Female | 47           | 66            | No           | No       |
|                           | #11 | Female | 60           | 74            | No           | No       |
|                           | #12 | Female | 51           | 64            | No           | No       |
|                           | #13 | Male   | 51           | 67            | No           | No       |
|                           | #14 | Male   | 50           | 73            | No           | No       |
| CS group                  | #15 | Male   | 59           | 56            | Yes          | No       |
|                           | #16 | Female | 64           | 60            | Yes          | No       |
|                           | #17 | Male   | 52           | 91            | Yes          | No       |
|                           | #18 | Female | 56           | 69            | No           | No       |
|                           | #19 | Female | 64           | 86            | Yes          | No       |
|                           | #20 | Male   | 47           | 88            | Yes          | No       |
|                           | #21 | Male   | 65           | 82            | Yes          | No       |
|                           | #22 | Female | 72           | 86            | Yes          | No       |
|                           | #23 | Female | 67           | 75            | Yes          | Yes      |
|                           | #24 | Male   | 62           | 78            | Yes          | No       |
| CS-AIS group              | #25 | Female | 76           | 80            | Yes          | No       |
|                           | #26 | Female | 72           | 65            | Yes          | No       |
|                           | #27 | Male   | 64           | 65            | Yes          | No       |
|                           | #28 | Female | 68           | 57            | Yes          | No       |
|                           | #29 | Male   | 69           | 80            | Yes          | No       |
|                           | #30 | Male   | 58           | 56            | Yes          | Yes      |
|                           | #31 | Female | 65           | 80            | Yes          | Yes      |
|                           | #32 | Male   | 54           | 83            | Yes          | No       |
|                           | #33 | Male   | 52           | 75            | Yes          | No       |
|                           | #34 | Female | 52           | 74            | Yes          | No       |

AIS: Acute ischemic stroke; CS: cerebrovascular stenosis.

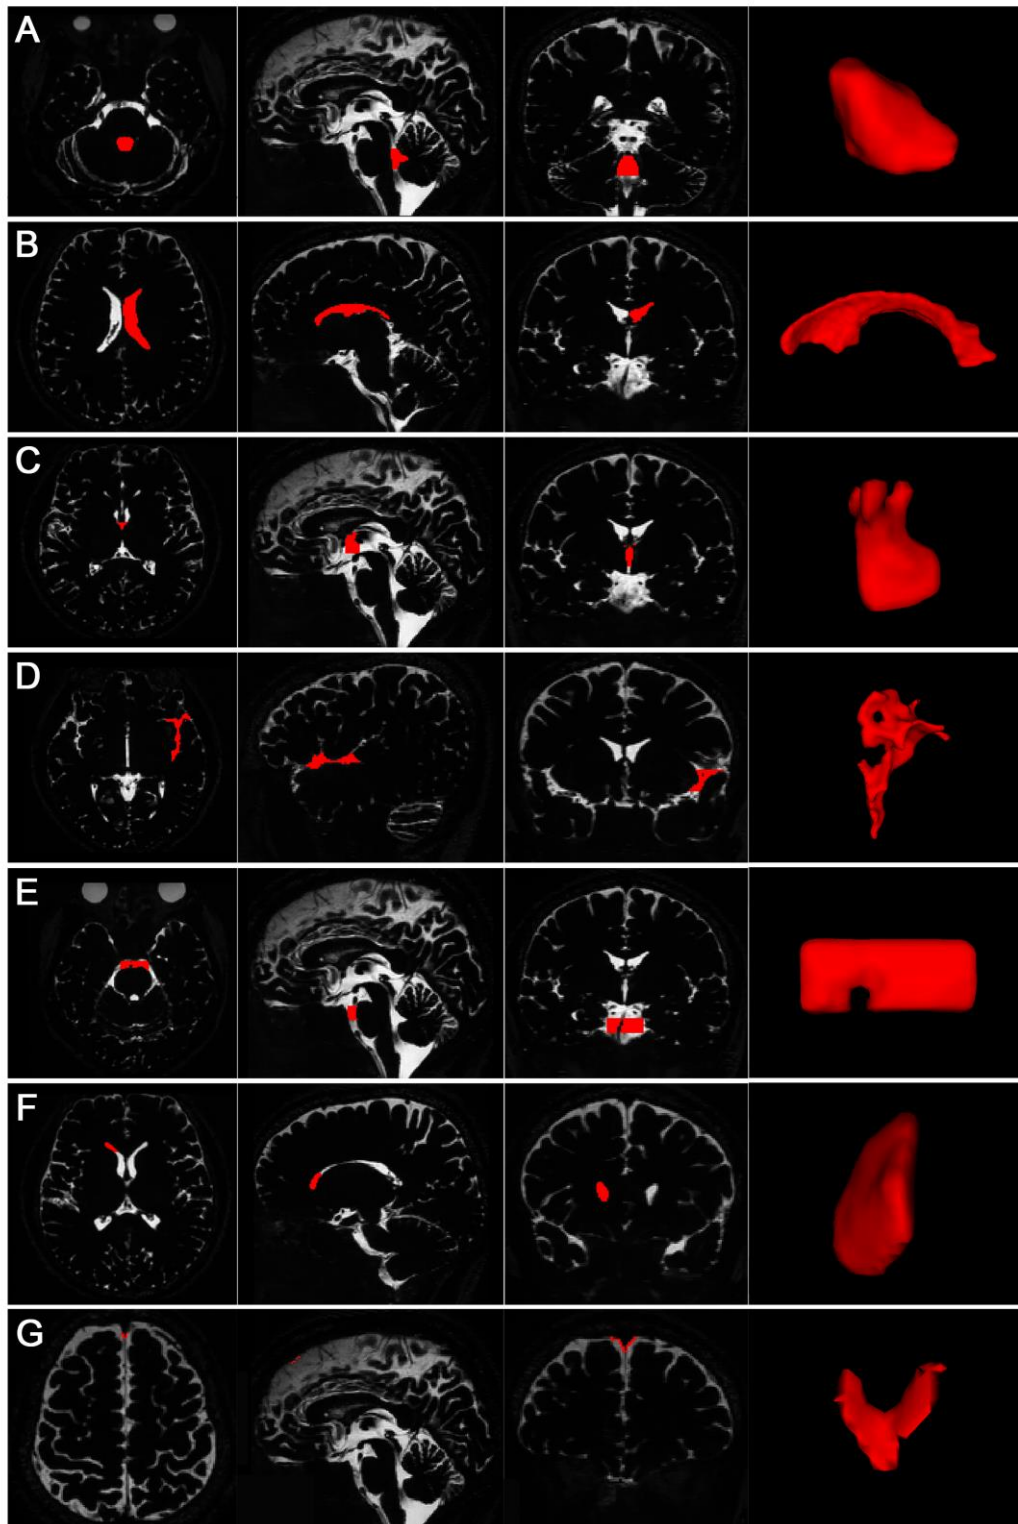

**Supplemental Figure 1.** Seven ROIs defined in this article: Forth ventricle (a), lateral ventricle (b), entrance from the foramen of Monro (c), sylvian fissure (d), prepontine cistern (e), anterior horn of the lateral ventricle (f) and around superior sagittal sinus (g).

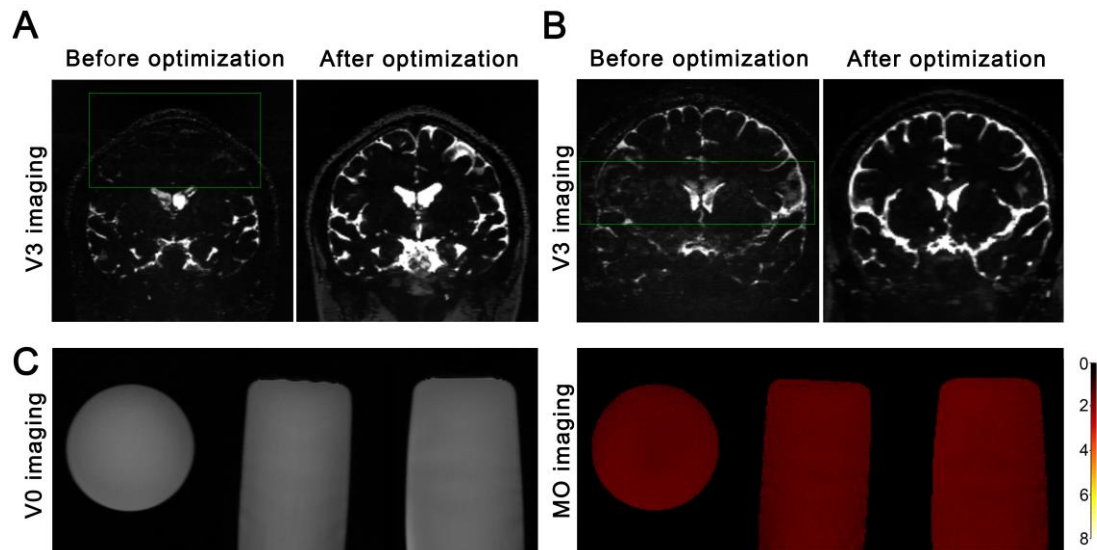

**Supplemental Figure 2.** Optimization and phantom imaging of the iMDDSDE-prepared, heavily T2-weighted 3D FSE sequence. (a, b) For V3 imaging, zeroth moment-compensated gradients usually resulted in CSF flow-induced signal loss in the parietal area and phase mismatch errors surrounding the lateral ventricles. These imaging artefacts were well-controlled with second order moment-compensated gradients. (c) The V0 and MO imaging of a water phantom at room temperature (18 °C), which had a mean value of  $1.88 \times 10^{-9} \text{ m}^2/\text{s}$ .
